# Supplementary material for: A Candidate Subspecies Discrimination System Involving a Vomeronasal Receptor Gene with Different Alleles Fixed in M. m. domesticus and M. m. musculus
Source: PLoS One. 2010 Sep 9;5(9):e12638. doi: 10.1371/journal.pone.0012638 (PMC2936562; doi:10.1371/journal.pone.0012638)
Supplement: Table S1 — Raw data from the Perlegen screen. Screen of the Perlegen SNP data on V1R genes ranked from most PWD-WSB SNPs to least. (0.05 MB XLS) [file pone.0012638.s001.xls]

## Sheet: Sheet1
Gene	Source	Start	End	Strand	NumSNPs	NumSNPsPWD-WSB
Vmn1r31	chr6	58422872	58421961	R	11	9
Vmn1r-ps26	chr6	89739395	89740405	F	10	8
Vmn1r-ps9	chr6	57228016	57228662	F	14	8
Vmn1r-ps37	chr6	107813302	107813740	F	8	8
Vmn1r75	chr7	12465692	12466609	F	10	8
Vmn1r-ps38	chr6	107815337	107814516	R	10	7
Vmn1r-ps61	chr7	12676620	12677594	F	19	7
Vmn1r-ps14	chr6	57999841	57998929	R	15	6
Vmn1r-ps27	chr6	89755986	89755002	R	12	6
Vmn1r-ps58	chr7	12563229	12562293	R	8	6
Vmn1r67	chr7	11032160	11033077	F	19	6
Vmn1r-ps20	chr6	58357321	58356448	R	9	5
Vmn1r-ps19	chr6	58207541	58206616	R	6	5
Vmn1r39	chr6	66755326	66754409	R	14	5
Vmn1r12	chr6	57108932	57109837	F	10	5
Vmn1r64	chr7	5836144	5835182	R	7	5
Vmn1r62	chr7	5626924	5627826	F	8	5
Vmn1r175	chr7	24594219	24593305	R	9	5
Vmn1r61	chr7	5562915	5562013	R	5	5
Vmn1r-ps150	chr17	21460728	21459995	R	5	5
Vmn1r37	chr6	66681386	66682294	F	4	4
Vmn1r16	chr6	57273629	57272718	R	13	4
Vmn1r15	chr6	57208143	57209042	F	6	4
Vmn1r-ps18	chr6	58156041	58156991	F	5	4
Vmn1r183	chr7	24839793	24840710	F	8	4
Vmn1r172	chr7	24444711	24445652	F	9	4
Vmn1r171	chr7	24417371	24418321	F	4	4
Vmn1r-ps44	chr7	5777779	5777246	R	6	4
Vmn1r-ps53	chr7	12239442	12238479	R	8	4
Vmn1r-ps146	chr17	21217622	21217098	R	5	4
Vmn1r-ps144	chr17	21070588	21071488	F	4	4
Vmn1r225	chr17	20639263	20640159	F	6	4
Vmn1r26	chr6	57959196	57958177	R	3	3
Vmn1r25	chr6	57929296	57928388	R	15	3
Vmn1r21	chr6	57794451	57793558	R	5	3
Vmn1r35	chr6	66629678	66628788	R	6	3
Vmn1r19	chr6	57354458	57355384	F	9	3
Vmn1r-ps34	chr6	90192273	90193237	F	9	3
Vmn1r-ps33	chr6	90152763	90153705	F	6	3
Vmn1r4	chr6	56906507	56907400	F	6	3
Vmn1r-ps65	chr7	12799950	12800852	F	6	3
Vmn1r181	chr7	24769131	24770045	F	8	3
Vmn1r-ps84	chr7	24272316	24271394	R	7	3
Vmn1r-ps45	chr7	5882021	5881104	R	3	3
Vmn1r-ps87	chr7	28767880	28768832	F	3	3
Vmn1r177	chr7	24651468	24650539	R	4	3
Vmn1r60	chr7	5496701	5495799	R	5	3
Vmn1r-ps110	chr13	22721033	22719940	R	7	3
Vmn1r206	chr13	22712904	22711966	R	3	3
Vmn1r-ps107	chr13	22583474	22584054	F	4	3
Vmn1r-ps1	chr2	174416776	174417608	F	2	2
Vmn1r-ps22	chr6	58445241	58444343	R	8	2
Vmn1r-ps15	chr6	58028076	58027176	R	6	2
Vmn1r-ps13	chr6	57943578	57942984	R	3	2
Vmn1r17	chr6	57311372	57310461	R	12	2
Vmn1r-ps8	chr6	57138501	57139504	F	10	2
Vmn1r11	chr6	57087347	57088246	F	4	2
Vmn1r54	chr6	90219052	90220047	F	11	2
Vmn1r9	chr6	57020936	57021835	F	4	2
Vmn1r6	chr6	56952349	56953260	F	9	2
Vmn1r27	chr6	58166011	58165100	R	3	2
Vmn1r-ps63	chr7	12723675	12724660	F	9	2
Vmn1r77	chr7	12626648	12627568	F	7	2
Vmn1r85	chr7	13670564	13669638	R	6	2
Vmn1r182	chr7	24788130	24789047	F	10	2
Vmn1r-ps85	chr7	24563407	24564266	F	3	2
Vmn1r-ps46	chr7	5918821	5917872	R	7	2
Vmn1r-ps43	chr7	5720731	5719858	R	2	2
Vmn1r-ps57	chr7	12551117	12550815	R	3	2
Vmn1r176	chr7	24620745	24619831	R	7	2
Vmn1r87	chr7	13717707	13716820	R	2	2
Vmn1r56	chr7	5148218	5147286	R	2	2
Vmn1r-ps114	chr13	22937909	22936815	R	2	2
Vmn1r209	chr13	22898387	22897449	R	2	2
Vmn1r-ps113	chr13	22829962	22828857	R	4	2
Vmn1r203	chr13	22615920	22616855	F	4	2
Vmn1r201	chr13	22566487	22567389	F	6	2
Vmn1r198	chr13	22446215	22447117	F	4	2
Vmn1r196	chr13	22385062	22385967	F	3	2
Vmn1r192	chr13	22279917	22279015	R	3	2
Vmn1r-ps95	chr13	22215164	22216062	F	7	2
Vmn1r-ps92	chr13	22149781	22149037	R	6	2
Vmn1r-ps132	chr13	23293948	23293051	R	5	2
Vmn1r-ps129	chr13	23245179	23245697	F	6	2
Vmn1r-ps124	chr13	23108235	23108079	R	2	2
Vmn1r233	chr17	21131650	21130691	R	7	2
Vmn1r-ps145	chr17	21106549	21105966	R	7	2
Vmn1r232	chr17	21051300	21050245	R	10	2
Vmn1r227	chr17	20872170	20873090	F	3	2
Vmn1r235	chr17	21398379	21399365	F	2	2
Vmn1r-ps148	chr17	21381805	21382259	F	3	2
Vmn1r1	chr1	184088229	184087309	R	7	1
Vmn1r-ps2	chr4	3031739	3030846	R	1	1
Vmn1r-ps23	chr6	58454689	58454477	R	2	1
Vmn1r-ps21	chr6	58405987	58405061	R	4	1
Vmn1r30	chr6	58385839	58384931	R	14	1
Vmn1r-ps17	chr6	58066624	58065730	R	5	1
Vmn1r-ps16	chr6	58058246	58058013	R	1	1
Vmn1r24	chr6	57906525	57905635	R	5	1
Vmn1r-ps29	chr6	89947557	89948058	F	6	1
Vmn1r38	chr6	66727124	66726216	R	8	1
Vmn1r-ps25	chr6	89649559	89648651	R	12	1
Vmn1r32	chr6	66503784	66502876	R	1	1
Vmn1r-ps35	chr6	91378800	91378266	R	1	1
Vmn1r-ps11	chr6	57398214	57397359	R	1	1
Vmn1r-ps10	chr6	57262933	57263769	F	4	1
Vmn1r14	chr6	57183451	57184344	F	6	1
Vmn1r10	chr6	57063419	57064354	F	9	1
Vmn1r52	chr6	90128710	90129639	F	3	1
Vmn1r-ps32	chr6	90103041	90103996	F	5	1
Vmn1r8	chr6	56985960	56986871	F	1	1
Vmn1r5	chr6	56935336	56936283	F	2	1
Vmn1r-ps7	chr6	3094564	3093644	R	2	1
Vmn1r80	chr7	12778314	12779240	F	3	1
Vmn1r180	chr7	24737433	24738350	F	7	1
Vmn1r169	chr7	24362204	24363118	F	2	1
Vmn1r168	chr7	24325739	24326668	F	6	1
Vmn1r82	chr7	12890154	12891068	F	3	1
Vmn1r65	chr7	5960835	5959837	R	3	1
Vmn1r63	chr7	5755233	5754331	R	4	1
Vmn1r-ps42	chr7	5679613	5680213	F	3	1
Vmn1r-ps59	chr7	12580265	12580429	F	2	1
Vmn1r76	chr7	12516634	12515660	R	3	1
Vmn1r-ps56	chr7	12497490	12496473	R	4	1
Vmn1r-ps54	chr7	12367472	12367611	F	2	1
Vmn1r73	chr7	12341606	12342517	F	6	1
Vmn1r69	chr7	11166151	11165192	R	4	1
Vmn1r-ps86	chr7	27040099	27040645	F	7	1
Vmn1r179	chr7	24713405	24714376	F	3	1
Vmn1r91	chr7	20686507	20687430	F	1	1
Vmn1r113	chr7	21572304	21573227	F	2	1
Vmn1r-ps41	chr7	5606294	5607239	F	5	1
Vmn1r88	chr7	13763068	13764018	F	3	1
Vmn1r58	chr7	5362831	5361899	R	2	1
Vmn1r72	chr7	12255868	12254948	R	2	1
Vmn1r68	chr7	11113518	11112559	R	6	1
Vmn1r212	chr13	22976030	22975092	R	4	1
Vmn1r-ps116	chr13	22967177	22966974	R	2	1
Vmn1r211	chr13	22944364	22943468	R	2	1
Vmn1r207	chr13	22818491	22817553	R	2	1
Vmn1r-ps109	chr13	22718344	22717600	R	2	1
Vmn1r205	chr13	22684799	22683849	R	1	1
Vmn1r200	chr13	22486898	22487836	F	2	1
Vmn1r-ps102	chr13	22477493	22478403	F	3	1
Vmn1r-ps101	chr13	22462440	22462701	F	2	1
Vmn1r195	chr13	22370231	22371181	F	7	1
Vmn1r194	chr13	22336084	22336974	F	3	1
Vmn1r191	chr13	22271451	22270555	R	3	1
Vmn1r190	chr13	22237394	22236390	R	1	1
Vmn1r-ps94	chr13	22184023	22184458	F	2	1
Vmn1r-ps133	chr13	23320642	23320198	R	3	1
Vmn1r-ps130	chr13	23258480	23258922	F	3	1
Vmn1r218	chr13	23228354	23229250	F	4	1
Vmn1r-ps128	chr13	23216358	23218112	F	1	1
Vmn1r-ps127	chr13	23196217	23196659	F	2	1
Vmn1r214	chr13	23126207	23127310	F	3	1
Vmn1r213	chr13	23103118	23104272	F	1	1
Vmn1r231	chr17	21027615	21026680	R	5	1
Vmn1r229	chr17	20951459	20952379	F	2	1
Vmn1r-ps139	chr17	20259549	20258681	R	9	1
Vmn1r226	chr17	20824472	20825368	F	1	1
Vmn1r224	chr17	20556127	20557023	F	4	1
Vmn1r-ps141	chr17	20541986	20542741	F	3	1
Vmn1r237	chr17	21450981	21451850	F	8	1
Vmn1r234	chr17	21365790	21366779	F	4	1
Vmn1r3	chr4	3112452	3111532	R	1	0
Vmn1r2	chr4	3099230	3100150	F	1	0
Vmn1r-ps3	chr4	3067205	3066288	R	1	0
Vmn1r-ps4	chr5	3000998	3000138	R	1	0
Vmn1r29	chr6	58257291	58258202	F	16	0
Vmn1r28	chr6	58215168	58216076	F	2	0
Vmn1r-ps12	chr6	57822910	57822410	R	2	0
Vmn1r50	chr6	90057269	90058201	F	1	0
Vmn1r49	chr6	90023012	90022080	R	4	0
Vmn1r-ps31	chr6	90006684	90006406	R	1	0
Vmn1r47	chr6	89971882	89972814	F	5	0
Vmn1r-ps30	chr6	89953768	89954586	F	5	0
Vmn1r46	chr6	89926090	89927094	F	5	0
Vmn1r45	chr6	89883980	89883024	R	5	0
Vmn1r-ps28	chr6	89857671	89858612	F	4	0
Vmn1r44	chr6	89843268	89844200	F	3	0
Vmn1r42	chr6	89795579	89794590	R	2	0
Vmn1r41	chr6	89696473	89697408	F	1	0
Vmn1r40	chr6	89664197	89665129	F	2	0
Vmn1r33	chr6	66562562	66561645	R	4	0
Vmn1r20	chr6	57381685	57382596	F	7	0
Vmn1r18	chr6	57340561	57339662	R	1	0
Vmn1r53	chr6	90174334	90173402	R	1	0
Vmn1r51	chr6	90079173	90080087	F	1	0
Vmn1r-ps5	chr6	3023073	3022180	R	1	0
Vmn1r90	chr7	15147520	15146591	R	1	0
Vmn1r120	chr7	21838803	21837886	R	2	0
Vmn1r-ps74	chr7	21877129	21877701	F	2	0
Vmn1r124	chr7	22045636	22044713	R	2	0
Vmn1r127	chr7	22104880	22103963	R	2	0
Vmn1r128	chr7	22134392	22135315	F	2	0
Vmn1r-ps75	chr7	22178279	22177360	R	1	0
Vmn1r81	chr7	12846028	12845108	R	2	0
Vmn1r151	chr7	23284697	23283780	R	1	0
Vmn1r-ps64	chr7	12787041	12787779	F	5	0
Vmn1r78	chr7	12737813	12738754	F	1	0
Vmn1r-ps62	chr7	12698608	12699425	F	2	0
Vmn1r86	chr7	13688296	13687346	R	1	0
Vmn1r-ps68	chr7	12989834	12989448	R	9	0
Vmn1r84	chr7	12948113	12947157	R	1	0
Vmn1r83	chr7	12907477	12906557	R	3	0
Vmn1r-ps60	chr7	12590381	12591030	F	2	0
Vmn1r74	chr7	12432124	12433038	F	4	0
Vmn1r71	chr7	11334108	11333185	R	8	0
Vmn1r-ps51	chr7	11235648	11235967	F	1	0
Vmn1r70	chr7	11218936	11219832	F	1	0
Vmn1r-ps50	chr7	11190557	11190092	R	4	0
Vmn1r185	chr7	27397097	27396138	R	2	0
Vmn1r184	chr7	27051850	27052794	F	4	0
Vmn1r178	chr7	24678548	24679462	F	2	0
Vmn1r103	chr7	21095883	21094966	R	1	0
Vmn1r160	chr7	23656243	23657166	F	1	0
Vmn1r158	chr7	23575801	23574878	R	2	0
Vmn1r114	chr7	21597205	21596240	R	1	0
Vmn1r-ps40	chr7	5524710	5524331	R	2	0
Vmn1r-ps69	chr7	13829511	13829807	F	1	0
Vmn1r89	chr7	13804688	13805638	F	1	0
Vmn1r59	chr7	5406361	5405429	R	2	0
Vmn1r-ps39	chr7	5379877	5379526	R	1	0
Vmn1r57	chr7	5172080	5173012	F	2	0
Vmn1r-ps48	chr7	10885837	10886728	F	5	0
Vmn1r66	chr7	10860453	10859521	R	2	0
Vmn1r-ps49	chr7	11135784	11134888	R	5	0
Vmn1r210	chr13	22919983	22919063	R	1	0
Vmn1r-ps112	chr13	22825792	22824869	R	1	0
Vmn1r204	chr13	22648019	22648978	F	2	0
Vmn1r-ps104	chr13	22541510	22542228	F	3	0
Vmn1r-ps103	chr13	22533141	22534033	F	2	0
Vmn1r199	chr13	22474407	22475510	F	2	0
Vmn1r197	chr13	22419780	22420676	F	6	0
Vmn1r-ps100	chr13	22391347	22390481	R	1	0
Vmn1r193	chr13	22311689	22310730	R	1	0
Vmn1r-ps99	chr13	22267464	22266564	R	1	0
Vmn1r-ps97	chr13	22228894	22228293	R	4	0
Vmn1r188	chr13	22179747	22180673	F	1	0
Vmn1r-ps135	chr13	23360749	23361370	F	1	0
Vmn1r222	chr13	23324910	23323984	R	2	0
Vmn1r-ps131	chr13	23290500	23290161	R	1	0
Vmn1r220	chr13	23276393	23275497	R	1	0
Vmn1r215	chr13	23167661	23168563	F	1	0
Vmn1r-ps126	chr13	23148527	23149486	F	2	0
Vmn1r-ps125	chr13	23115120	23115415	F	1	0
Vmn1r-ps136	chr14	62162539	62162956	F	3	0
Vmn1r-ps137	chr16	3088644	3089562	F	1	0
Vmn1r230	chr17	20983515	20984465	F	1	0
Vmn1r228	chr17	20914218	20913217	R	8	0
Vmn1r-ps143	chr17	20570380	20569684	R	2	0
Vmn1r-ps142	chr17	20564242	20563396	R	9	0
Vmn1r-ps140	chr17	20329457	20328579	R	6	0
Vmn1r236	chr17	21423586	21424590	F	3	0
Vmn1r-ps152	chr18	3081476	3080778	R	1	0
Vmn1r-ps151	chr18	3027802	3026901	R	2	0
